# Supplementary material for: Crystal and electronic structures, and photoluminescence and photocatalytic properties of α-EuZrS3
Source: Royal Society of Chemistry journal article supplement (doi:10.1039/c6nj02106a), 2016-01-01
Supplement: c6nj02106a2.pdf [file c6nj02106a2.pdf]

## ***Supporting Information***

### **Crystal and Electronic Structures, Photoluminescent and Photocatalytic Properties of $\alpha$ -EuZrS<sub>3</sub>**

Sheng-Ping Guo,\* Yang Chi,\* Jian-Ping Zou\* and Huai-Guo Xue\*

*College of Chemistry & Chemical Engineering, Yangzhou University, Yangzhou, Jiangsu  
225002, P. R. China*

*Corresponding authors: [spguo@yzu.edu.cn](mailto:spguo@yzu.edu.cn); [chhgxue@yzu.edu.cn](mailto:chhgxue@yzu.edu.cn)*

**Table S1.** Atomic coordinates ( $\times 10^4$ ) and equivalent isotropic displacement parameters ( $U_{\text{eq}}^a$ ,  $\text{\AA}^2 \times 10^3$ ) for  $\alpha$ -EuZrS<sub>3</sub>.

| atom  | <i>x</i> | <i>y</i> | <i>z</i> | $U_{\text{eq}}/\text{\AA}^2$ |
|-------|----------|----------|----------|------------------------------|
| Eu(1) | 5668(1)  | 2500     | 6787(1)  | 11(1)                        |
| Zr(1) | 8274(1)  | 2500     | 4426(1)  | 6(1)                         |
| S(1)  | 4822(2)  | 2500     | 8926(1)  | 7(1)                         |
| S(2)  | 2951(2)  | -2500    | 7173(1)  | 9(1)                         |
| S(3)  | 3387(1)  | 2500     | 4860(1)  | 9(1)                         |

$^aU_{\text{eq}}$  is defined as one third of the trace of the orthogonalized  $U_{ij}$  tensor.

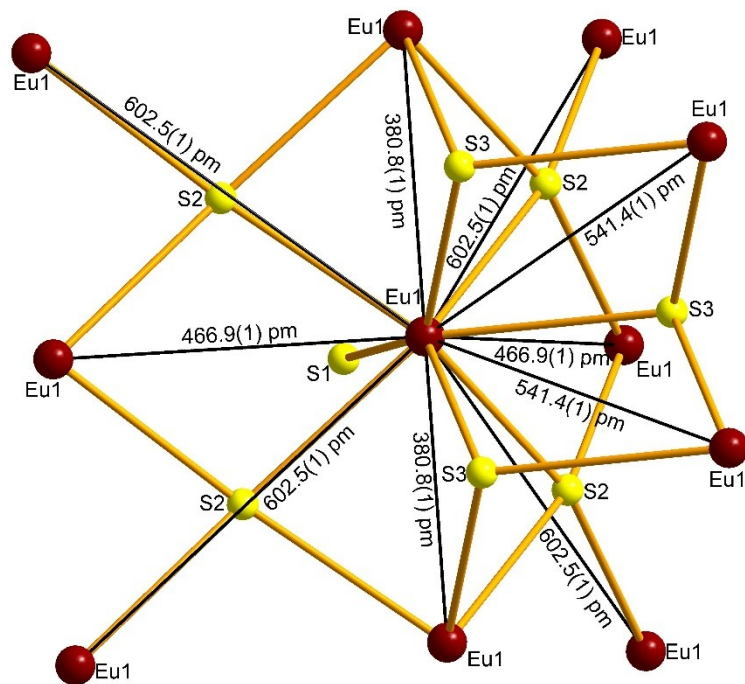

**Fig. S1** Neighboring Eu-S and Eu-Eu distances in  $\alpha$ -EuZrS<sub>3</sub>.

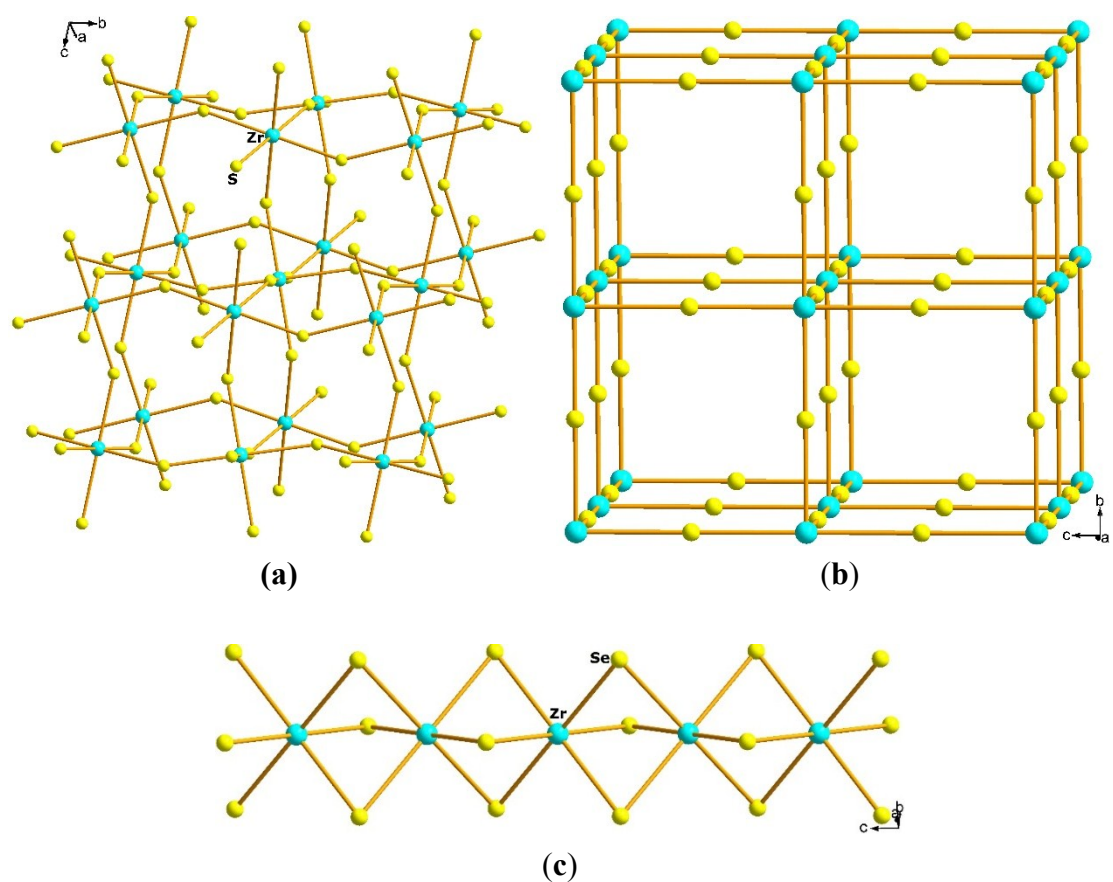

**Fig. S2** The structure motifs constructed by Zr-S bonds in  $\beta$ -EuZrS<sub>3</sub> (*Pnma*) (a) and BaZrS<sub>3</sub> (*P4/mmm*) (b), and Zr-Se bonds in BaZrSe<sub>3</sub> (*P6<sub>3</sub>/mmc*) (c).
